# Supplementary material for: Hyperbranched polymer based fluorescent probes for ppt level nerve agent simulant vapor detection
Source: Royal Society of Chemistry journal article supplement (doi:10.1039/c6ay03427f), 2017-01-01
Supplement: c6ay03427f1.pdf [file c6ay03427f1.pdf]

## Supplemental Information

### **Hyperbranched polymer based fluorescent probes for ppt level nerve agent simulant vapor detection**

Haibo Jiang<sup>a,b,c</sup>, Pengcheng Wu<sup>a,b,c</sup>, Yu Zhang<sup>a</sup>, Zinuo Jiao<sup>a,c</sup>, Wei Xu<sup>a,c</sup>, Xiangtao Zhang<sup>a,c</sup>, Yanyan Fu<sup>a</sup>, Qingguo He<sup>a\*</sup>, Huimin Cao<sup>a</sup> and Jiangong Cheng<sup>a\*</sup>

<sup>a</sup>State Key Lab of Transducer Technology, Shanghai Institute of Microsystem and Information Technology, Chinese Academy of Sciences, Changning Road 865, Shanghai 200050, China.

<sup>b</sup>School of Physical Science and Technology, ShanghaiTech University, Haike Road 100, Shanghai, 201210, China.

<sup>c</sup>University of the Chinese Academy of Sciences, Yuquan Road 19, Beijing, 100039, China.

# Catalogue

|                                                     |   |
|-----------------------------------------------------|---|
| Supporting Information .....                        | 1 |
| 1. NMR data .....                                   | 3 |
| 2. Stability and Sensing Properties .....           | 5 |
| 3. Detection of possible interferents .....         | 5 |
| 4. Fluorescence spectra.....                        | 7 |
| 5. Elemental Analysis data .....                    | 8 |
| 6. Detail methodology and parameters of DMol3 ..... | 8 |

## 1. NMR data

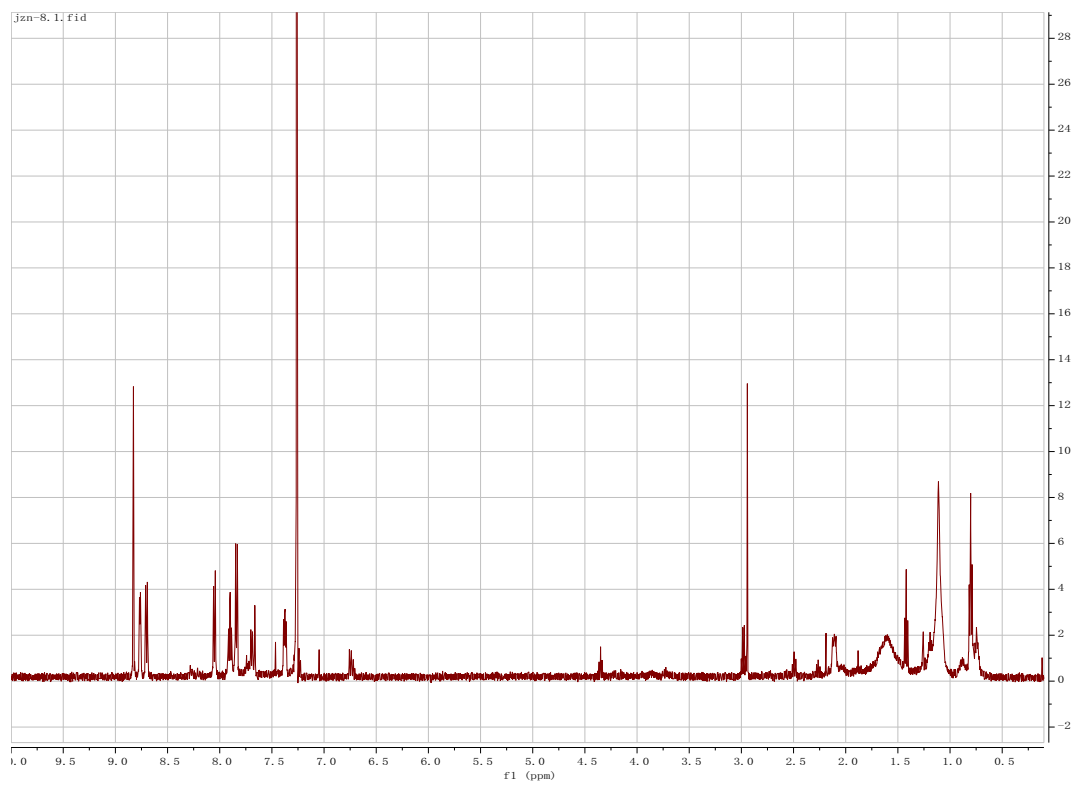

Figure S1. <sup>1</sup>H NMR spectrum of HPFP in CDCl<sub>3</sub>.

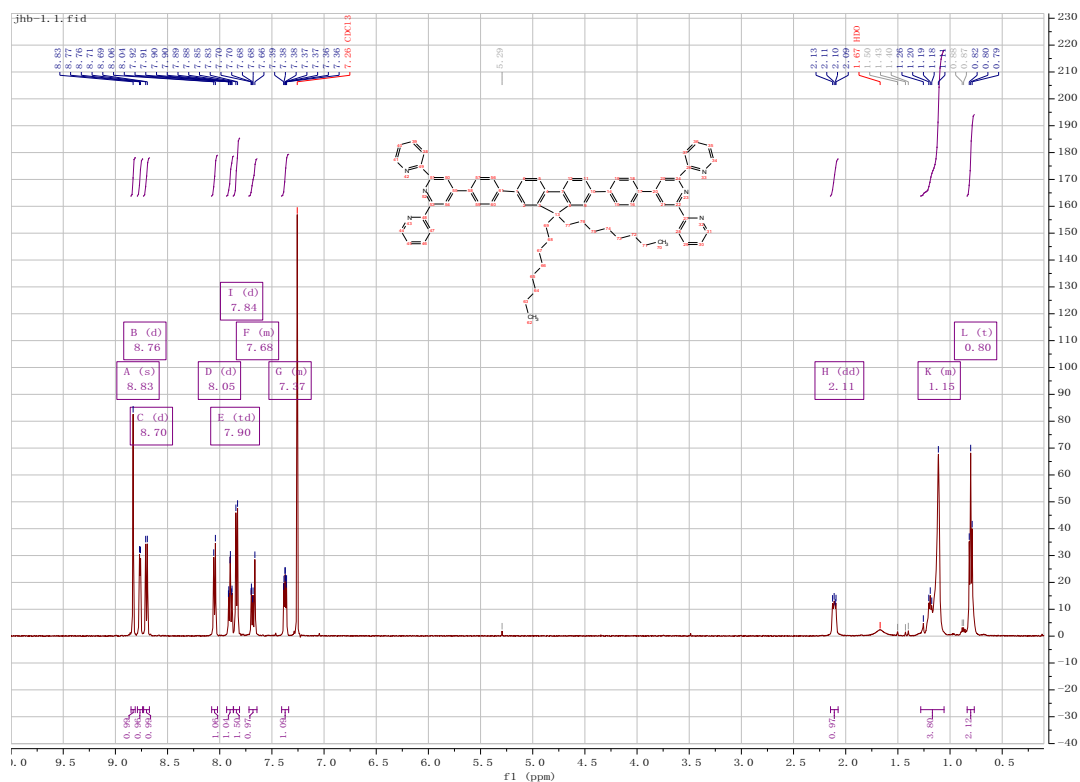

Figure S2. <sup>1</sup>H NMR spectrum of TPF in CDCl<sub>3</sub>.

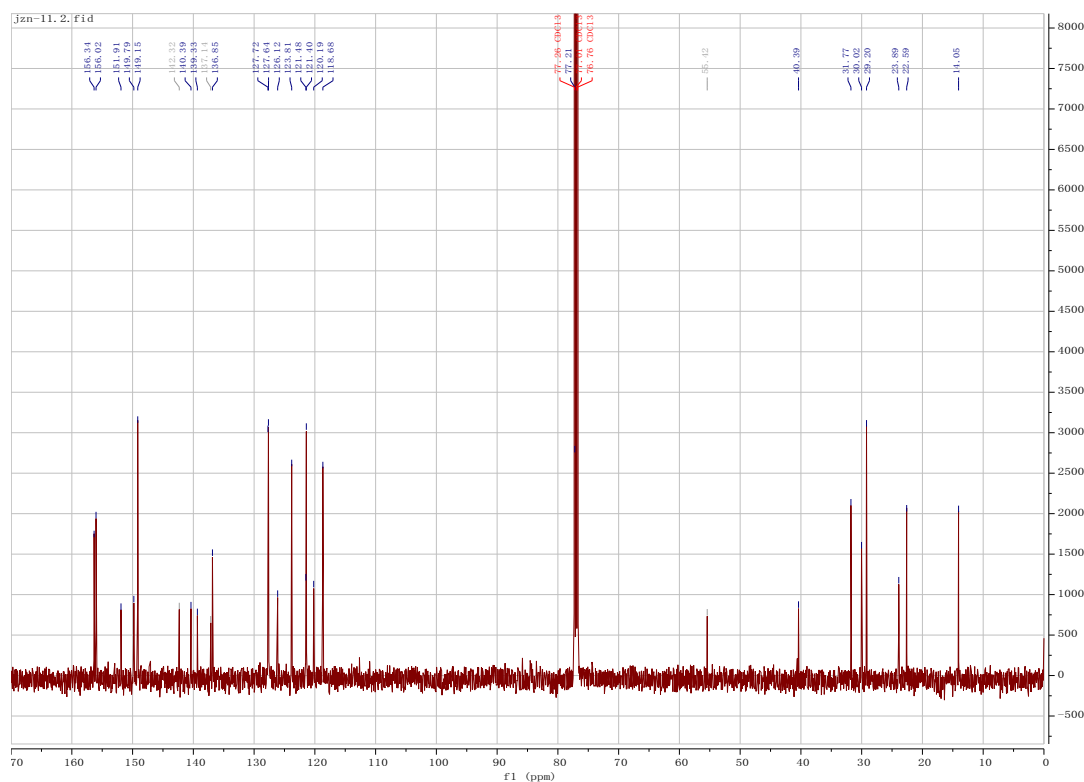

Figure S3. <sup>13</sup>C NMR spectrum of TPF in CDCl<sub>3</sub>.

## 2. Stability and Sensing Properties

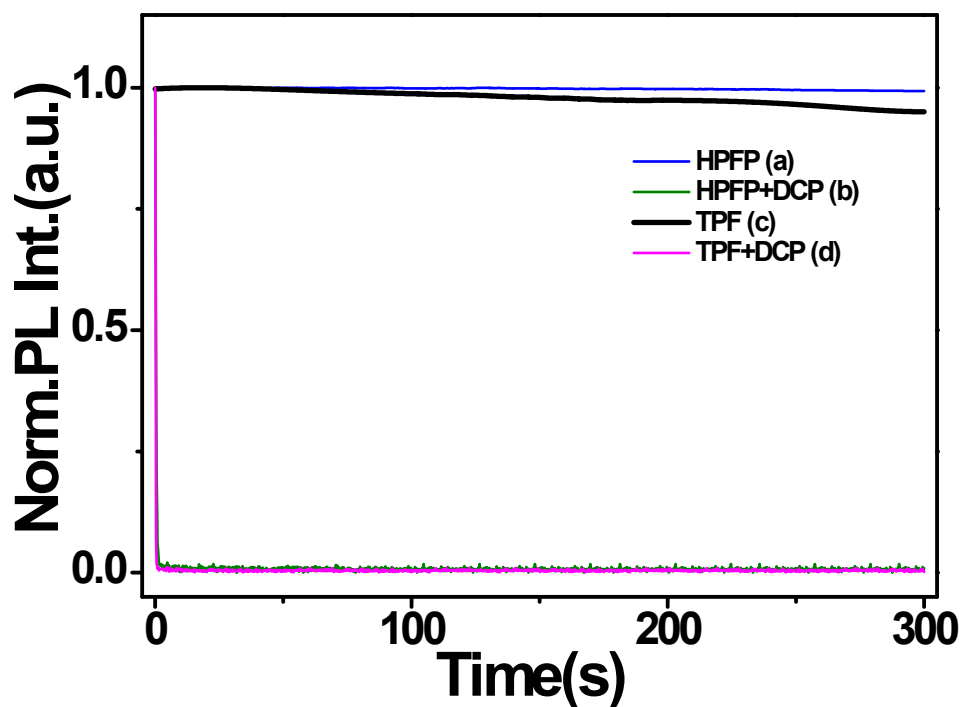

Figure S4. Stability and sensing properties of HPFP and TPF films in air and in saturated DCP vapor for 300 s (a: HPFP in air; b: HPFP in saturated DCP vapor; c: TPF in air; d: TPF in saturated DCP vapor).

## 3. Detection of possible interferents

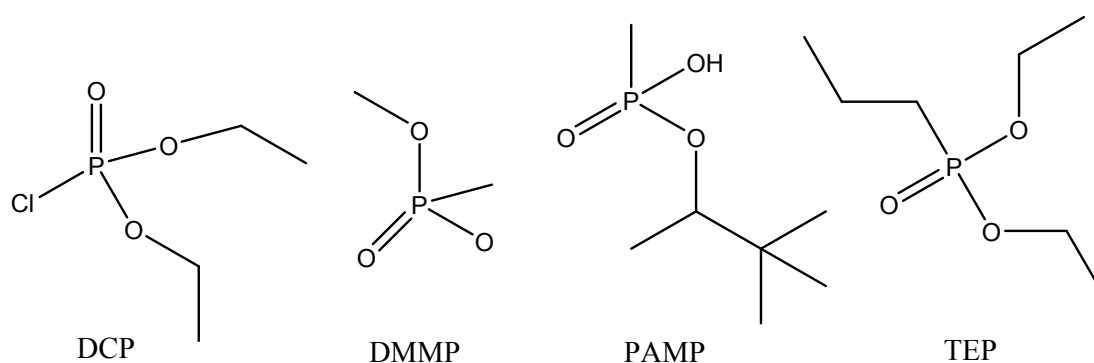

Figure S5. Chemical structures of DCP and the available organophosphonate compounds.

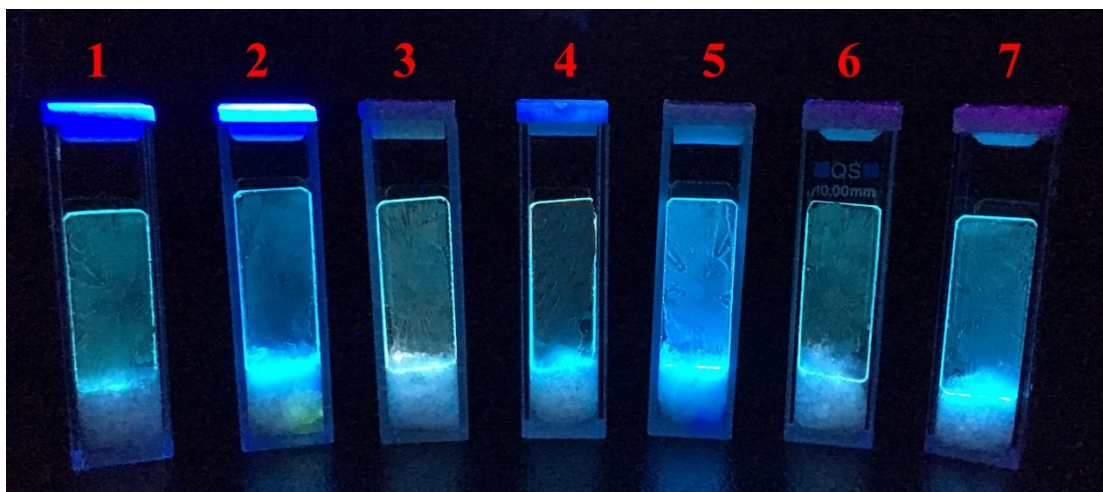

Figure S6. HPFP films excited by UV lamp 365 nm after exposure in solvent vapor (1 H<sub>2</sub>O, 2 THF, 3 Acetone, 4 Ethyl Acetate, 5 Toluene, 6 Ethyl Alcohol, 7 Chloroform).

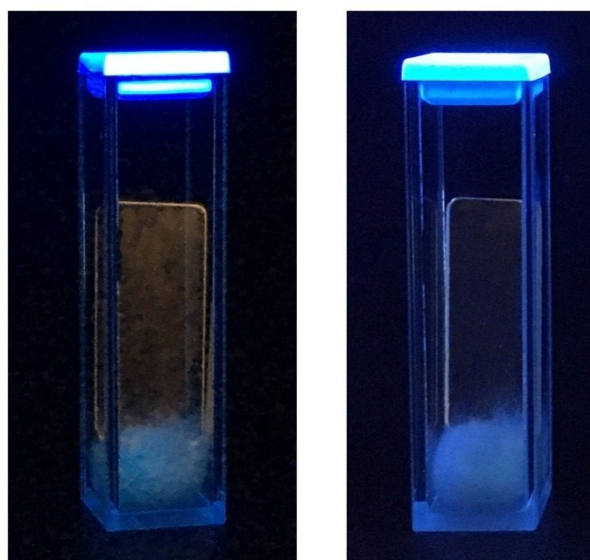

Figure S7. HPFP films excited by UV lamp 365 nm after exposure in DCP (left) and HCl (right) vapor.

#### 4. Fluorescence spectra

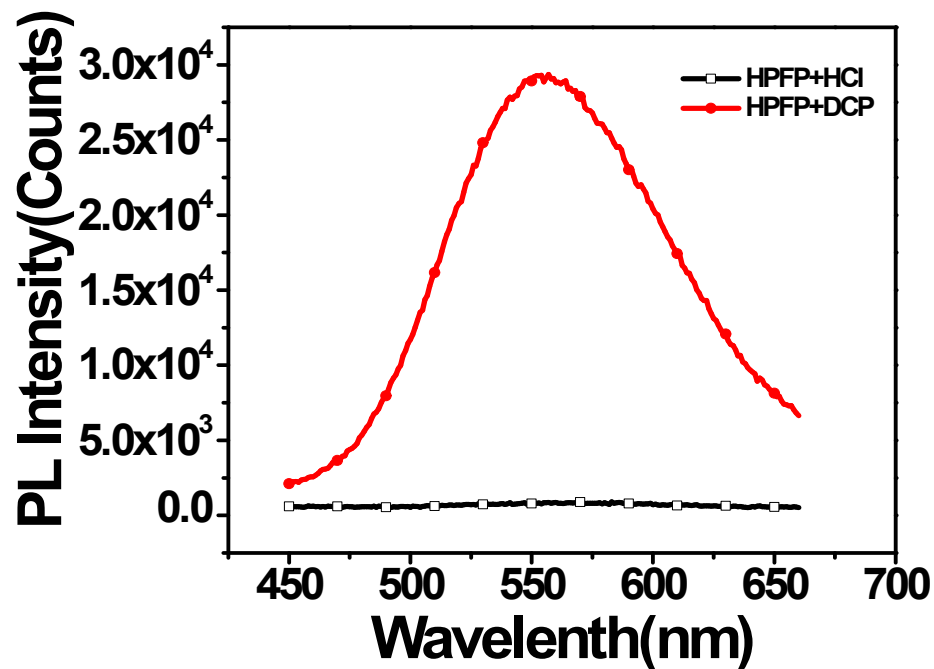

Figure S8. Emission spectra of HPFP films after interaction with DCP and HCl.

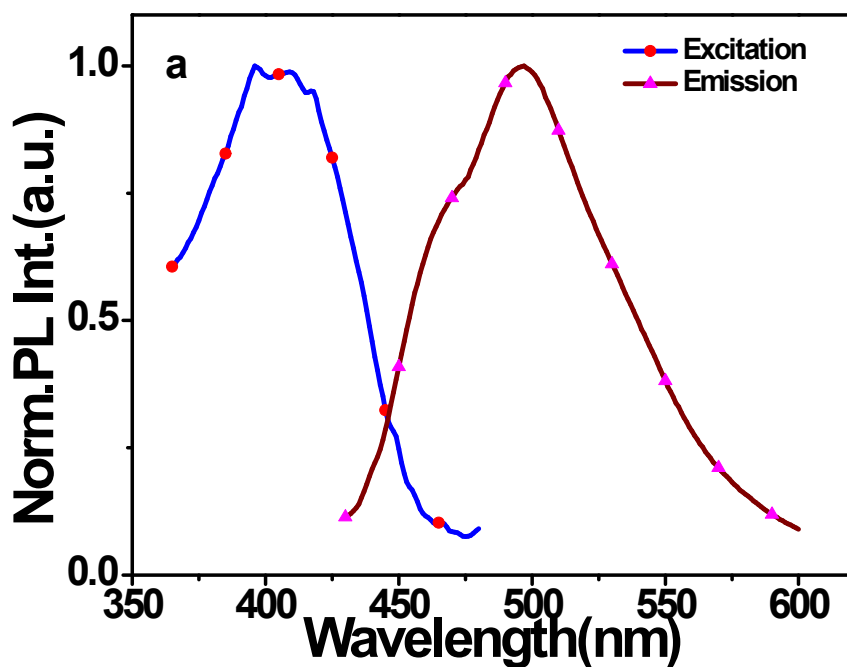

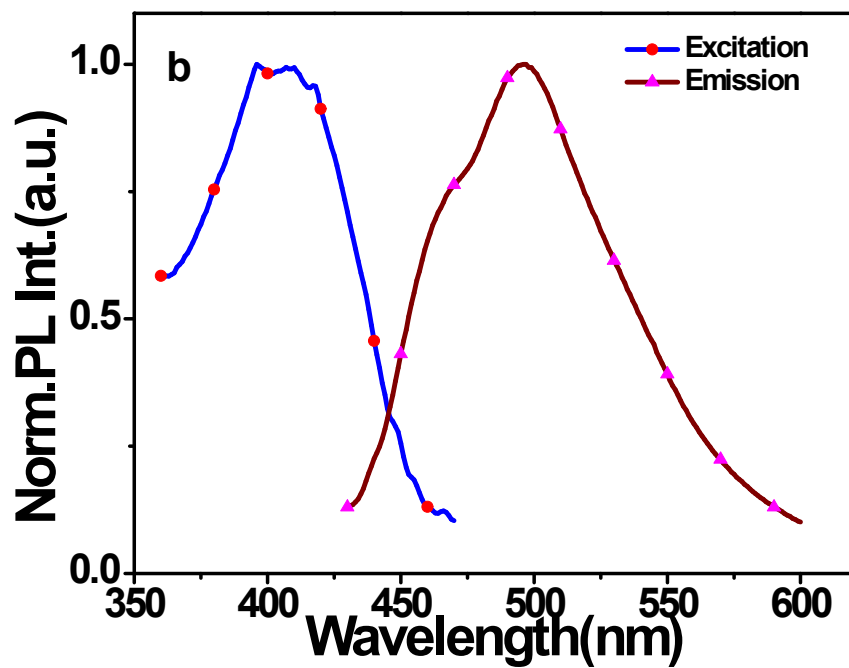

Figure S9. Excitation and emission spectra of borate ester end capped pyrene-fluorene polymer before (a) and after (b) exposure to DCP vapor.

## 5. Elemental Analysis data

Table S1. Elemental Analysis data

| Sample                 |    | TPF    | TPF+DCP | TPF+HCl |
|------------------------|----|--------|---------|---------|
| Composition Percentage | N  | 8.20%  | 5.55%   | 5.68%   |
|                        | C  | 84.48% | 60.64%  | 60.31%  |
|                        | H  | 6.94   | 6.68%   | 6.23%   |
|                        | P  |        | 1.19%   |         |
|                        | Cl |        | 13.03%  | 15.87%  |



## 6. Detail methodology and parameters of DMol3

Table S2. Detail methodology and parameters of DMol3

| <b>DMol3</b>           |                          |
|------------------------|--------------------------|
| Task                   | Geometry<br>Optimization |
| Properties             | Optics, Orbitals         |
| Energy                 | $1.0^{-5}$ Ha            |
| Max. force             | 0.002 Ha/Å               |
| Max. displacement      | 0.005 Å                  |
| Max. iterations        | 1000                     |
| Max. step size         | 0.3 Å                    |
| Functional             | GGA,BLYP                 |
| Integration accuracy   | Fine                     |
| SCF tolerance          | Fine                     |
| Core treatment         | All Electron             |
| Basis set              | DNP+                     |
| Basis file             | 4.4                      |
| Orbital cutoff quality | Fine                     |
| Run in parallel on     | 12 cores                 |
